# Supplementary material for: Polydopamine Incorporation Enhances Cell Differentiation and Antibacterial Properties of 3D-Printed Guanosine-Borate Hydrogels for Functional Tissue Regeneration
Source: MDPI journal article supplement (doi:10.3390/ijms24044224), 2023-02-20
Supplement: s1 [file s1]

Supporting Information

# **Polydopamine Incorporation Enhances Cell Differentiation and Antibacterial Properties of 3D-Printed Guanosine-Borate Hydrogels for Functional Tissue Regeneration**

Maria Merino-Gómez, Javier Gil, Roman A. Perez<sup>\*</sup>, Maria Godoy-Gallardo<sup>\*</sup>

**Table S1.** Scoring table translating the measured values of the measured printability parameters such as collapse area factor ( $C_f$ ), diffusion rate ( $D_{fr}$ ), printability ( $P_r$ ), and angle deviation rate ( $D_a$ ) into a score ranging from 0 to 40, with 40 being best.

| Score | Collapse area factor ( $C_f$ ) | Diffusion rate ( $D_{fr}$ ) | Printability ( $P_r$ ) | Angle deviation rate ( $D_a$ ) |
|-------|--------------------------------|-----------------------------|------------------------|--------------------------------|
| 2     | 96 – 100%                      | 96 – 100%                   | 0.00 – 0.05            | 96 – 100%                      |
| 4     | 90 – 95%                       | 90 – 95%                    | 0.05 – 0.10            | 90 – 95%                       |
| 6     | 85 – 90%                       | 85 – 90%                    | 0.10 – 0.15            | 85 – 90%                       |
| 8     | 80 – 85%                       | 80 – 85%                    | 0.15 – 0.20            | 80 – 85%                       |
| 10    | 75 – 80%                       | 75 – 80%                    | 0.20 – 0.25            | 75 – 80%                       |
| 12    | 70 – 75%                       | 70 – 75%                    | 0.25 – 0.30            | 70 – 75%                       |
| 14    | 65 – 70%                       | 65 – 70%                    | 0.30 – 0.35            | 65 – 70%                       |
| 16    | 60 – 65%                       | 60 – 65%                    | 0.35 – 0.40            | 60 – 65%                       |
| 18    | 55 – 60%                       | 55 – 60%                    | 0.40 – 0.45            | 55 – 60%                       |
| 20    | 50 – 55%                       | 50 – 55%                    | 0.45 – 0.50            | 50 – 55%                       |
| 22    | 45 – 50%                       | 45 – 50%                    | 0.50 – 0.55            | 45 – 50%                       |
| 24    | 40 – 45%                       | 40 – 45%                    | 0.55 – 0.60            | 40 – 45%                       |
| 26    | 35 – 40%                       | 35 – 40%                    | 0.60 – 0.65            | 35 – 40%                       |
| 28    | 30 – 35%                       | 30 – 35%                    | 0.65 – 0.70            | 30 – 35%                       |
| 30    | 25 – 30%                       | 25 – 30%                    | 0.70 – 0.75            | 25 – 30%                       |
| 32    | 20 – 25%                       | 20 – 25%                    | 0.75 – 0.80            | 20 – 25%                       |
| 34    | 15 – 20%                       | 15 – 20%                    | 0.80 – 0.85            | 15 – 20%                       |
| 36    | 10 – 15%                       | 10 – 15%                    | 0.85 – 0.90            | 10 – 15%                       |
| 38    | 5 – 10%                        | 5 – 10%                     | 0.90 – 0.95            | 5 – 10%                        |
| 40    | 0 – 5%                         | 0 – 5%                      | 0.95 – 1.00            | 0 – 5%                         |

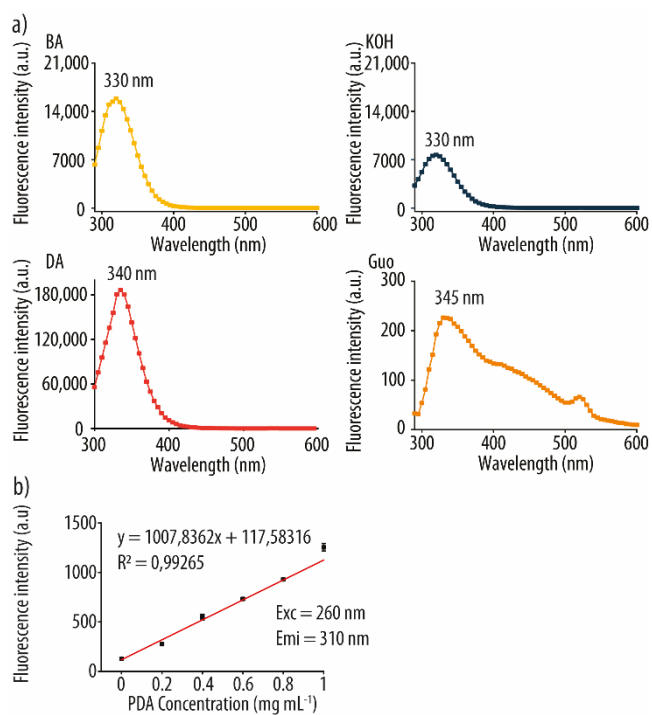

**Figure S1.** (a) Fluorescence intensity scan of boric acid (BA), potassium hydroxide (KOH), dopamine (DA), guanosine (Guo) with excitation and emission wavelength of 260 and 300-600 nm, respectively. (b) Calibration curve of Fluorescence intensity if polydopamine (PDA) vs. distinct concentrations of PDA.

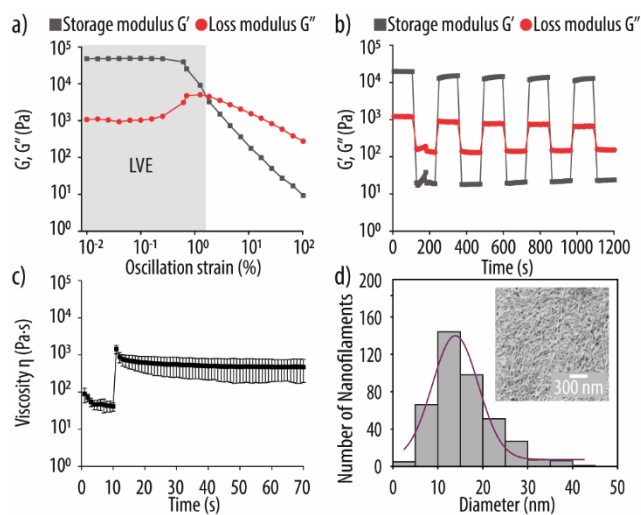

**Figure S2.** Rheological measurement of guanosine-boric acid (GB) hydrogel at 37 °C. **(a)** Storage modulus ( $G'$ ) and loss modulus ( $G''$ ) of PGB hydrogels using a strain amplitude sweep (0.1-100%) at a fixed angular frequency ( $10 \text{ rad s}^{-1}$ ). Each interval was kept constant for 100 s. **(b)** After applying a shear rate of  $3.45 \text{ s}^{-1}$  for 10 seconds to mimic the observed forces during 3D printing, we allowed the hydrogel to recover at  $0.1 \text{ s}^{-1}$  for 60 s. Within  $\sim 6$  s, optimal hydrogel viscosity was regained. **(c)** Viscosity of PGB hydrogels using a strain range of 0.01-100% and a fixed oscillation frequency of 1 Hz. **(d)** Representative scanning electron microscope (SEM) image of a PGB hydrogel cross-section showing the internal nanofibrillar network and the diameter distribution of the observed nanofibers.
